# Supplementary material
Source: PubMed Central journal article supplement (PMC5556955)
Supplement: JCOPDF-3-716-s001.pdf [file JCOPDF-3-716-s001.pdf]

## **Original Research**

### **Long-Term Maintenance Bronchodilation With Indacaterol/Glycopyrrolate Versus Indacaterol in Moderate-to-Severe COPD Patients: The FLIGHT 3 Study**

Gary T. Ferguson, MD<sup>1</sup> Angel Fowler Taylor, BSc, Pharm<sup>2</sup> Chau Thach, PhD<sup>2</sup> Qian Wang, PhD<sup>3</sup> Agnes A. Schubert-Tennigkeit, MD<sup>4</sup> Francesco Patalano, MD<sup>4</sup> and Donald Banerji, MD<sup>2</sup>

<sup>1</sup>Pulmonary Research Institute of Southeast Michigan-Farmington Hills

<sup>2</sup>Novartis Pharmaceuticals Corporation, East Hanover, New Jersey

<sup>3</sup>Beijing Novartis Pharma Co. Ltd., Shanghai, China

<sup>4</sup>Novartis Pharma AG, Basel, Switzerland

## eTable 1. Exclusion Criteria

|                                                                                                                                                                                                                                                                                                                                                                                                                                                              |
|--------------------------------------------------------------------------------------------------------------------------------------------------------------------------------------------------------------------------------------------------------------------------------------------------------------------------------------------------------------------------------------------------------------------------------------------------------------|
| Pregnant or nursing (lactating) women.                                                                                                                                                                                                                                                                                                                                                                                                                       |
| Women of child-bearing potential, unless using effective methods of contraception during the study treatment period.                                                                                                                                                                                                                                                                                                                                         |
| Patients with Type 1 or uncontrollable Type 2 diabetes.                                                                                                                                                                                                                                                                                                                                                                                                      |
| Patients with a history of long QT syndrome or whose QTc measured at run-in was prolonged (>450 ms by Fridericia method) and confirmed by a central assessor.                                                                                                                                                                                                                                                                                                |
| Patients who had a clinically significant ECG abnormality at run-in                                                                                                                                                                                                                                                                                                                                                                                          |
| Patients who had a clinically significant laboratory abnormality at run-in                                                                                                                                                                                                                                                                                                                                                                                   |
| Patients with a body mass index (BMI) of more than 40 kg/m <sup>2</sup> .                                                                                                                                                                                                                                                                                                                                                                                    |
| Patients with clinically significant renal, CV disease (such as but not limited to unstable ischemic heart disease, New York Heart Association Class 3/4 left ventricular failure, myocardial infarction [MI]), arrhythmia (see below for patients with atrial fibrillation), neurological, endocrine, immunological, psychiatric, gastrointestinal, hepatic, or hematological abnormalities which could interfere with the efficacy and safety assessments. |
| Patients with paroxysmal atrial fibrillation. Patients with persistent atrial fibrillation controlled with a rate control strategy (resting ventricular rate < 100/min at Visit 101 and Visit 102) could be considered for inclusion.                                                                                                                                                                                                                        |
| Patients contraindicated for treatment with, or having a history of reactions/hypersensitivity to muscarinic antagonist agents, long- and short-acting $\beta$ 2 agonists, sympathomimetic amines, lactose or other excipients, and similar class or component.                                                                                                                                                                                              |
| Patients with a history of malignancy of any organ system, treated or untreated, within the past 5 years with exception of localized basal cell carcinoma of the skin.                                                                                                                                                                                                                                                                                       |
| Patients with narrow-angle glaucoma, symptomatic benign prostatic hyperplasia or bladder-neck obstruction or moderate to severe renal impairment or urinary retention.                                                                                                                                                                                                                                                                                       |
| Patients who had not achieved an acceptable spirometry result at run-in in accordance with American Thoracic Society (ATS)/European Respiratory Society (ERS) criteria for acceptability and repeatability.                                                                                                                                                                                                                                                  |
| Patients who have had a COPD exacerbation that required treatment with antibiotics and/or systemic corticosteroids and/or hospitalization in the 6 weeks prior to Visit.                                                                                                                                                                                                                                                                                     |
| Patients developing COPD exacerbation between screening (Visit 1) and treatment (Visit 201) were not eligible but were permitted to be re-enrolled 6 weeks after the resolution.                                                                                                                                                                                                                                                                             |
| Patients who had a respiratory tract infection within 4 weeks prior to screening.                                                                                                                                                                                                                                                                                                                                                                            |
| Patients who developed a respiratory tract infection between screening and prior to treatment were not eligible, but were permitted to be re-enrolled 4 weeks after the resolution.                                                                                                                                                                                                                                                                          |
| Patients requiring long term oxygen therapy prescribed for >12 hours per day.                                                                                                                                                                                                                                                                                                                                                                                |
| Patients with any history of asthma.                                                                                                                                                                                                                                                                                                                                                                                                                         |
| Patients with an onset of respiratory symptoms, including a COPD diagnosis, prior to age 40 years.                                                                                                                                                                                                                                                                                                                                                           |
| Patients with a blood eosinophil count > 600/mm <sup>3</sup> at run-in.                                                                                                                                                                                                                                                                                                                                                                                      |
| Patients with allergic rhinitis on H1 antagonist or intra-nasal corticosteroids intermittently.                                                                                                                                                                                                                                                                                                                                                              |
| Patients with concomitant pulmonary disease (e.g. lung fibrosis, sarcoidosis, interstitial lung disease, pulmonary hypertension).                                                                                                                                                                                                                                                                                                                            |
| Patients with clinically significant bronchiectasis.                                                                                                                                                                                                                                                                                                                                                                                                         |
| Patients with a diagnosis of $\alpha$ -1 anti-trypsin deficiency.                                                                                                                                                                                                                                                                                                                                                                                            |
| Patients with active pulmonary tuberculosis.                                                                                                                                                                                                                                                                                                                                                                                                                 |
| Patients with pulmonary lobectomy or lung volume reduction surgery or lung transplantation.                                                                                                                                                                                                                                                                                                                                                                  |
| Patients who participated in or planned to participate in the active phase of a supervised pulmonary rehabilitation program during the study.                                                                                                                                                                                                                                                                                                                |
| Patients receiving any prohibited medications such as (non-potassium sparing diuretics, non-selective beta blocking agents, cardiac anti-arrhythmics Class Ia and III, drugs with QT prolongation potential, tricyclic antidepressants, antipsychotic agents, etc.)                                                                                                                                                                                          |
| Patients receiving any prohibited COPD related medications (LAMA, LABA/ICS, short-acting muscarinic antagonist (SAMA), SABA, SABA/SAMA, etc) were to undergo washout prior to Visit 101.                                                                                                                                                                                                                                                                     |
| Patients receiving selective serotonin reuptake inhibitors, ICS, intra-nasal steroids H1-antagonists, inactivated influenza, pneumococcal or any other inactivated vaccine were to be excluded unless on stable dose.                                                                                                                                                                                                                                        |
| Use of other investigational drugs/devices (approved or unapproved) at the time of enrollment, or within 30 days or 5 half-lives of randomization.                                                                                                                                                                                                                                                                                                           |
| Patients unable to use an electronic patient diary (eDiary).                                                                                                                                                                                                                                                                                                                                                                                                 |
| Patients unable to use a dry powder inhaler device or a pressurized metered-dose inhaler (rescue medication) or comply with the study regimen.                                                                                                                                                                                                                                                                                                               |
| Investigational site staff, their immediate family, or sponsor staff concerned with this study, were excluded from participation.                                                                                                                                                                                                                                                                                                                            |

**eTable 2. ECG Parameters (as measured by QTcF)**

| <b>Number of Patients With Newly Occurring or Worsening Clinically Notable Fridericia's Qtc Values and Increases From Baseline at Any Time Post-Baseline (Safety Set)</b>                                                                                                                                                                                                                                                                                                                                                                                                                                                                                                                                       |                                                        |                                                        |                                            |
|-----------------------------------------------------------------------------------------------------------------------------------------------------------------------------------------------------------------------------------------------------------------------------------------------------------------------------------------------------------------------------------------------------------------------------------------------------------------------------------------------------------------------------------------------------------------------------------------------------------------------------------------------------------------------------------------------------------------|--------------------------------------------------------|--------------------------------------------------------|--------------------------------------------|
| <b>Variable Criterion</b>                                                                                                                                                                                                                                                                                                                                                                                                                                                                                                                                                                                                                                                                                       | <b>IND/GLY<br/>27.5/15.6 bid<br/>N=204<br/>n/m (%)</b> | <b>IND/GLY<br/>27.5/31.2 bid<br/>N=204<br/>n/m (%)</b> | <b>IND<br/>75 µg<br/>N=206<br/>n/m (%)</b> |
| <b>QTc (Fridericia)</b>                                                                                                                                                                                                                                                                                                                                                                                                                                                                                                                                                                                                                                                                                         |                                                        |                                                        |                                            |
| N*                                                                                                                                                                                                                                                                                                                                                                                                                                                                                                                                                                                                                                                                                                              | 204                                                    | 204                                                    | 206                                        |
| > 450 ms                                                                                                                                                                                                                                                                                                                                                                                                                                                                                                                                                                                                                                                                                                        | 14 (6.9)                                               | 18 (8.8)                                               | 19 (9.2)                                   |
| > 480 ms                                                                                                                                                                                                                                                                                                                                                                                                                                                                                                                                                                                                                                                                                                        | 3 (1.5)                                                | 1 (0.5)                                                | 0                                          |
| > 500 ms                                                                                                                                                                                                                                                                                                                                                                                                                                                                                                                                                                                                                                                                                                        | 0                                                      | 0                                                      | 0                                          |
| <b>Change from baseline in QTc (Fridericia)</b>                                                                                                                                                                                                                                                                                                                                                                                                                                                                                                                                                                                                                                                                 |                                                        |                                                        |                                            |
| N*                                                                                                                                                                                                                                                                                                                                                                                                                                                                                                                                                                                                                                                                                                              | 204                                                    | 204                                                    | 206                                        |
| Increase 30 – 60 ms                                                                                                                                                                                                                                                                                                                                                                                                                                                                                                                                                                                                                                                                                             | 26 (12.7)                                              | 24 (11.8)                                              | 27 (13.1)                                  |
| Increase > 60 ms                                                                                                                                                                                                                                                                                                                                                                                                                                                                                                                                                                                                                                                                                                | 1 (0.5)                                                | 2 (1.0)                                                | 1 (0.5)                                    |
| <p>n = number of patients meeting the criterion, i.e. who had a newly occurring clinically notable value or had a worsening of a value during treatment which was already notable at baseline. For patients with a missing value at baseline, any post-baseline notable value was considered as newly occurring.</p> <p>N* = number of patients with a post-baseline QTcF value, considering data from scheduled, unscheduled or premature discontinuation visits up to 7 days after last dose. For the increase from baseline both a post-baseline and baseline QTcF value must be available.</p> <p>Notable QTc categories are not mutually exclusive. ECG: electrocardiogram, QTc: Corrected QT interval</p> |                                                        |                                                        |                                            |

**Etable 3. Vital Signs (Number of Patients with Newly Occurring or Worsening Clinically Notable Vital Signs at Any Time Post-Baseline (Safety Set))**

| <b>Number of Patients with Newly Occurring or Worsening Clinically Notable Vital Signs at Any Time Post-Baseline (Safety Set)</b>                                                                                                                                                                                                                                                                                                                                                                                                                                                                                                                                                                                                                                                       |                          |                                                        |                                                        |                                            |
|-----------------------------------------------------------------------------------------------------------------------------------------------------------------------------------------------------------------------------------------------------------------------------------------------------------------------------------------------------------------------------------------------------------------------------------------------------------------------------------------------------------------------------------------------------------------------------------------------------------------------------------------------------------------------------------------------------------------------------------------------------------------------------------------|--------------------------|--------------------------------------------------------|--------------------------------------------------------|--------------------------------------------|
| <b>Parameter</b>                                                                                                                                                                                                                                                                                                                                                                                                                                                                                                                                                                                                                                                                                                                                                                        | <b>Notable criterion</b> | <b>IND/GLY<br/>27.5/15.6 bid<br/>N=204<br/>n/m (%)</b> | <b>IND/GLY<br/>27.5/31.2 bid<br/>N=204<br/>n/m (%)</b> | <b>IND<br/>75 µg<br/>N=206<br/>n/m (%)</b> |
| Pulse rate                                                                                                                                                                                                                                                                                                                                                                                                                                                                                                                                                                                                                                                                                                                                                                              | Low                      | 4/204 (2.0)                                            | 3/204 (1.5)                                            | 3/206 (1.5)                                |
|                                                                                                                                                                                                                                                                                                                                                                                                                                                                                                                                                                                                                                                                                                                                                                                         | High                     | 1/204 (0.5)                                            | 0/204                                                  | 1/206 (0.5)                                |
| Systolic blood pressure                                                                                                                                                                                                                                                                                                                                                                                                                                                                                                                                                                                                                                                                                                                                                                 | Low                      | 2/204 (1.0)                                            | 1/204 (0.5)                                            | 2/206 (1.0)                                |
|                                                                                                                                                                                                                                                                                                                                                                                                                                                                                                                                                                                                                                                                                                                                                                                         | High                     | 3/204 (1.5)                                            | 5/204 (2.5)                                            | 3/206 (1.5)                                |
| Diastolic blood pressure                                                                                                                                                                                                                                                                                                                                                                                                                                                                                                                                                                                                                                                                                                                                                                | Low                      | 1/204 (0.5)                                            | 0/204                                                  | 2/206 (1.0)                                |
|                                                                                                                                                                                                                                                                                                                                                                                                                                                                                                                                                                                                                                                                                                                                                                                         | High                     | 3/204 (1.5)                                            | 3/204 (1.5)                                            | 2/206 (1.0)                                |
| Body weight                                                                                                                                                                                                                                                                                                                                                                                                                                                                                                                                                                                                                                                                                                                                                                             | Low                      | 19/189 (10.1)                                          | 8/191 (4.2)                                            | 17/192 (8.9)                               |
|                                                                                                                                                                                                                                                                                                                                                                                                                                                                                                                                                                                                                                                                                                                                                                                         | High                     | 14/189 (7.4)                                           | 20/191 (10.5)                                          | 18/192 (9.4)                               |
| <p>Notably abnormal vital signs and body weight:<br/>           Low pulse rate: &lt; 40 bpm, or ≤ 50 bpm with decrease from baseline of ≥ 15 bpm<br/>           High pulse rate: &gt; 130 bpm, or ≥ 120 bpm with increase from baseline of ≥ 15 bpm<br/>           Low systolic blood pressure: &lt; 75 mmHg, or ≤ 90 mmHg with decrease from baseline of ≥ 20 mmHg; High systolic blood pressure: &gt; 200 mmHg, or ≥ 180 mmHg with increase from baseline of ≥ 20 mmHg; Low diastolic blood pressure: &lt; 40 mmHg, or ≤ 50 mmHg with decrease from baseline of ≥ 15 mmHg; High diastolic blood pressure: &gt; 115 mmHg, or ≥ 105 mmHg with increase from baseline of ≥ 15 mmHg; Low body weight: &gt; 7% decrease from baseline High body weight: &gt; 7% increase from baseline</p> |                          |                                                        |                                                        |                                            |

**eFigure 1. LS mean change from baseline in pre-dose trough FVC (L)**

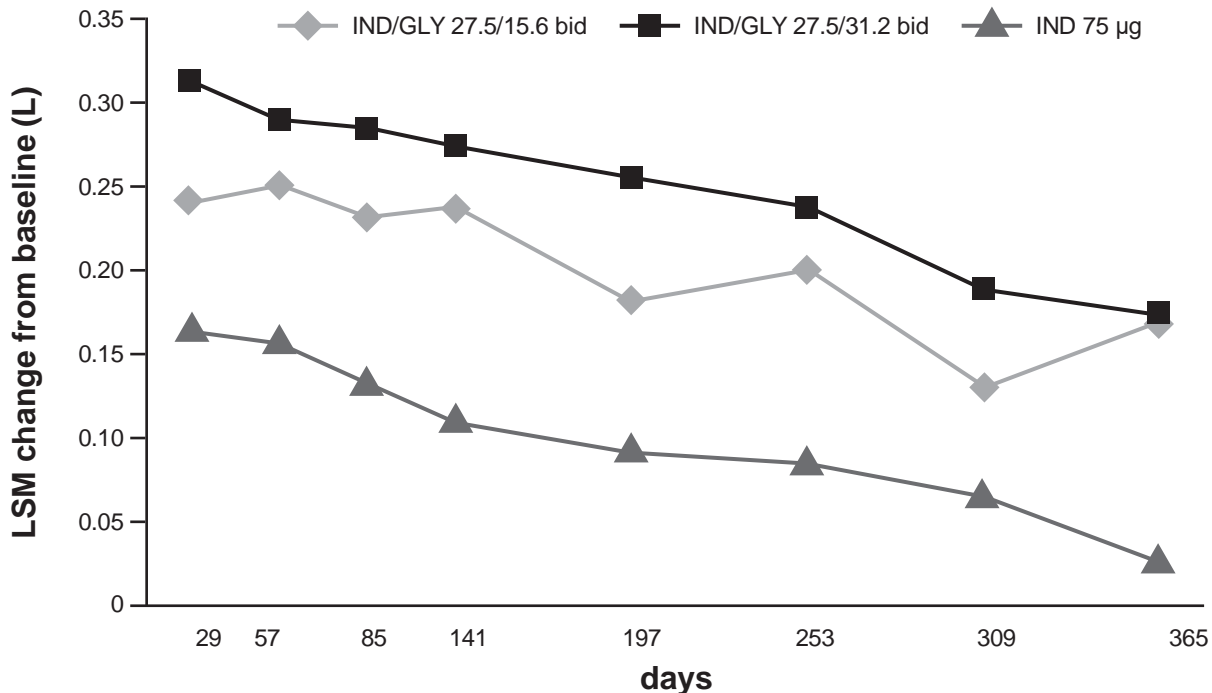

MMRM: Change from baseline in pre-dose trough FVC = treatment + baseline FVC + smoking status at baseline + baseline ICS use + airflow limitation severity + region + visit + treatment\*visit interaction + baseline FVC\*visit interaction.

Pre-dose trough FVC is defined as the mean of FVC at -45 min and -15 min before morning dose.

Baseline FVC is defined as the average of the -45 min and -15 min FVC values taken on Day 1 prior to first dose.

b.i.d., twice daily; GLY glycopyrronium; IND indacaterol; ICS, inhaled corticosteroid; LSM, least square mean;

MMRM, mixed-model repeated-measures; FVC, forced vital capacity; o.d., once daily

**eFigure 2. LS mean change from baseline in 1 hour post-dose FVC (L)**

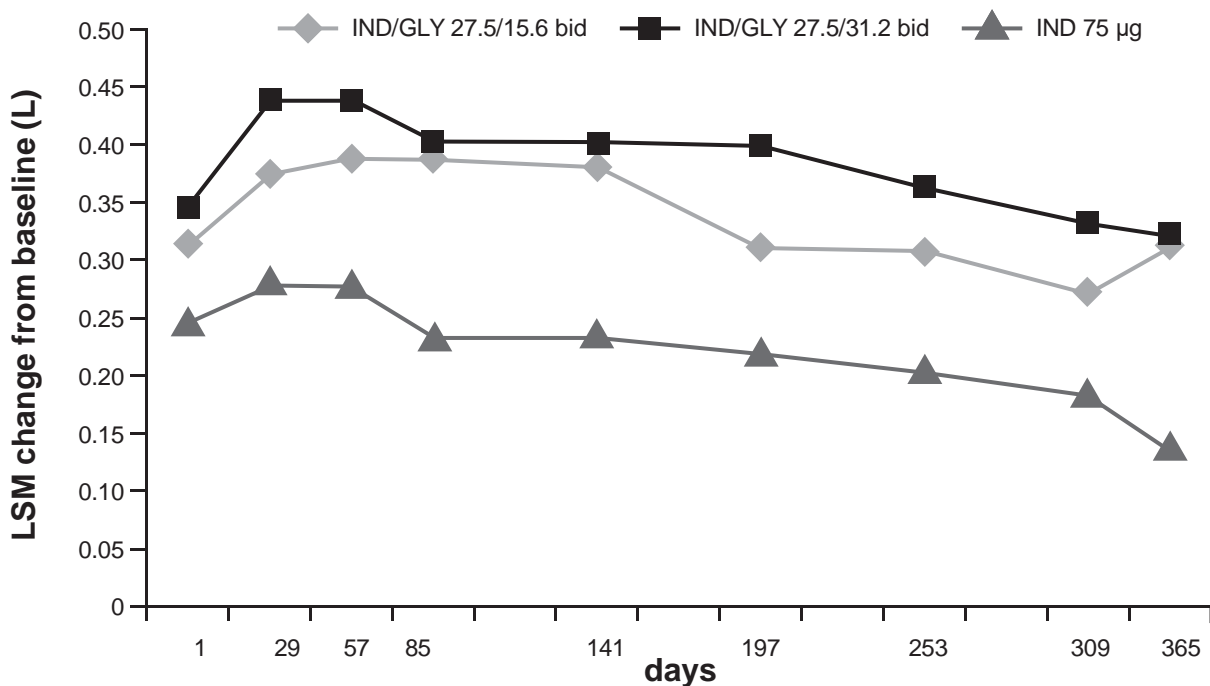

MMRM: Change from baseline in pre-dose trough FVC = treatment + baseline FVC + smoking status at baseline + baseline ICS use + airflow limitation severity + region + visit + treatment\*visit interaction + baseline FVC\*visit interaction.

Pre-dose trough FVC is defined as the mean of FVC at -45 min and -15 min before morning dose.

Baseline FVC is defined as the average of the -45 min and -15 min FVC values taken on Day 1 prior to first dose.

b.i.d., twice daily; GLY glycopyrronium; IND indacaterol; ICS, inhaled corticosteroid; LSM, least square mean;

MMRM, mixed-model repeated-measures; FVC, forced vital capacity; o.d., once daily

**eTable 4. Symptom Endpoints Over the 52 Weeks of Treatment Based on Data of the Patient Diary (FAS)**

| Treatment                                                                   | n   | Baseline Raw Mean | LS Mean (SE)  | Comparator | Treatment difference |               |         |
|-----------------------------------------------------------------------------|-----|-------------------|---------------|------------|----------------------|---------------|---------|
|                                                                             |     |                   |               |            | LS Mean (SE)         | (95% CI)      | p-value |
| <b>CFB in mean daily total symptom score</b>                                |     |                   |               |            |                      |               |         |
| All                                                                         | 595 | 6.44              |               |            |                      |               |         |
| IND/GLY 27.5/15.6 bid                                                       | 198 | 6.35              | -1.57 (0.133) | IND 75 µg  | -0.26 (0.177)        | (-0.61, 0.09) | 0.143   |
| IND/GLY 27.5/31.2 bid                                                       | 199 | 6.50              | -1.56 (0.133) | IND 75 µg  | -0.25 (0.178)        | (-0.60, 0.10) | 0.166   |
| IND 75 µg                                                                   | 198 | 6.48              | -1.31 (0.135) |            |                      |               |         |
| <b>CFB in mean daytime total symptom score</b>                              |     |                   |               |            |                      |               |         |
| All                                                                         | 587 | 5.88              |               |            |                      |               |         |
| IND/GLY 27.5/15.6 bid                                                       | 194 | 5.71              | -1.37 (0.130) | IND 75 µg  | -0.21 (0.172)        | (-0.55, 0.12) | 0.215   |
| IND/GLY 27.5/31.2 bid                                                       | 196 | 5.93              | -1.35 (0.129) | IND 75 µg  | -0.20 (0.172)        | (-0.54, 0.14) | 0.251   |
| IND 75 µg                                                                   | 197 | 5.99              | -1.15 (0.130) |            |                      |               |         |
| <b>CFB in mean nighttime total symptom score</b>                            |     |                   |               |            |                      |               |         |
| All                                                                         | 590 | 5.28              |               |            |                      |               |         |
| IND/GLY 27.5/15.6 bid                                                       | 196 | 5.26              | -1.29 (0.133) | IND 75 µg  | -0.27 (0.176)        | (-0.61, 0.08) | 0.130   |
| IND/GLY 27.5/31.2 bid                                                       | 199 | 5.30              | -1.28 (0.133) | IND 75 µg  | -0.25 (0.176)        | (-0.60, 0.09) | 0.149   |
| IND 75 µg                                                                   | 195 | 5.27              | -1.02 (0.135) |            |                      |               |         |
| <b>CFB in the percentage of nights with no nighttime awakenings</b>         |     |                   |               |            |                      |               |         |
| All                                                                         | 590 | 48.2              |               |            |                      |               |         |
| IND/GLY 27.5/15.6 bid                                                       | 196 | 50.3              | 18.0 (2.30)   | IND 75 µg  | 5.1 (2.87)           | (-0.6, 10.7)  | 0.078   |
| IND/GLY 27.5/31.2 bid                                                       | 199 | 46.1              | 18.6 (2.29)   | IND 75 µg  | 5.7 (2.88)           | (0.0, 11.3)   | 0.049   |
| IND 75 µg                                                                   | 195 | 48.2              | 12.9 (2.32)   |            |                      |               |         |
| <b>CFB in the percentage of days with no daytime symptoms</b>               |     |                   |               |            |                      |               |         |
| All                                                                         | 587 | 4.3               |               |            |                      |               |         |
| IND/GLY 27.5/15.6 bid                                                       | 194 | 4.7               | 10.2 (1.71)   | IND 75 µg  | 5.5 (2.27)           | (1.1, 10.0)   | 0.015   |
| IND/GLY 27.5/31.2 bid                                                       | 196 | 4.8               | 6.5 (1.71)    | IND 75 µg  | 1.8 (2.27)           | (-2.7, 6.2)   | 0.440   |
| IND 75 µg                                                                   | 197 | 3.6               | 4.7 (1.72)    |            |                      |               |         |
| <b>CFB in the percentage of days able to perform usual daily activities</b> |     |                   |               |            |                      |               |         |
| All                                                                         | 587 | 30.2              |               |            |                      |               |         |
| IND/GLY 27.5/15.6 bid                                                       | 194 | 33.0              | 14.7 (2.25)   | IND 75 µg  | 7.4 (2.86)           | (1.8, 13.1)   | 0.010   |
| IND/GLY 27.5/31.2 bid                                                       | 196 | 29.2              | 11.1 (2.24)   | IND 75 µg  | 3.8 (2.86)           | (-1.8, 9.4)   | 0.187   |
| IND 75 µg                                                                   | 197 | 28.3              | 7.3 (2.26)    |            |                      |               |         |

All LS Means, SEs, CIs, and p-values are from a LMM: Change from baseline (CFB) in mean score or percentage of nights/days = treatment + baseline value + smoking status at baseline + baseline ICS use + airflow limitation severity + region + random effect of center nested within country.

Baseline raw means are not from the model.

Only the scores for the 6 COPD symptoms (respiratory symptoms, cough, wheeze, production of sputum, sputum color, breathlessness) were used to derive the total symptom score.

**eTable 5. Rescue Medication Intake Over the 52 Weeks of Treatment Based on Data of the Patient Diary (FAS)**

| Treatment                                                          | n   | Baseline Raw Mean | LS Mean (SE)  | Comparator | Treatment difference |               |         |
|--------------------------------------------------------------------|-----|-------------------|---------------|------------|----------------------|---------------|---------|
|                                                                    |     |                   |               |            | LS Mean (SE)         | (95% CI)      | p-value |
| <b>CFB in mean daily number of puffs of rescue medication</b>      |     |                   |               |            |                      |               |         |
| All                                                                | 595 | 4.03              |               |            |                      |               |         |
| IND/GLY 27.5/15.6 bid                                              | 198 | 4.13              | -1.89 (0.164) | IND 75 µg  | -0.16 (0.210)        | (-0.58, 0.25) | 0.440   |
| IND/GLY 27.5/31.2 bid                                              | 199 | 4.07              | -1.62 (0.164) | IND 75 µg  | 0.11 (0.211)         | (-0.30, 0.53) | 0.592   |
| IND 75 µg                                                          | 198 | 3.88              | -1.73 (0.166) |            |                      |               |         |
| <b>CFB in mean daytime number of puffs of rescue medication</b>    |     |                   |               |            |                      |               |         |
| All                                                                | 587 | 2.33              |               |            |                      |               |         |
| IND/GLY 27.5/15.6 bid                                              | 194 | 2.41              | -1.11 (0.093) | IND 75 µg  | -0.08 (0.122)        | (-0.32, 0.16) | 0.508   |
| IND/GLY 27.5/31.2 bid                                              | 196 | 2.36              | -0.95 (0.093) | IND 75 µg  | 0.08 (0.122)         | (-0.16, 0.32) | 0.517   |
| IND 75 µg                                                          | 197 | 2.21              | -1.03 (0.093) |            |                      |               |         |
| <b>CFB in mean nighttime number of puffs of rescue medication</b>  |     |                   |               |            |                      |               |         |
| All                                                                | 590 | 1.67              |               |            |                      |               |         |
| IND/GLY 27.5/15.6 bid                                              | 196 | 1.68              | -0.77 (0.076) | IND 75 µg  | -0.10 (0.098)        | (-0.29, 0.09) | 0.306   |
| IND/GLY 27.5/31.2 bid                                              | 199 | 1.69              | -0.66 (0.075) | IND 75 µg  | 0.01 (0.098)         | (-0.18, 0.20) | 0.910   |
| IND 75 µg                                                          | 195 | 1.63              | -0.67 (0.077) |            |                      |               |         |
| <b>CFB in the percentage of days with no rescue medication use</b> |     |                   |               |            |                      |               |         |
| All                                                                | 593 | 20.9              |               |            |                      |               |         |
| IND/GLY 27.5/15.6 bid                                              | 197 | 21.8              | 27.1 (2.76)   | IND 75 µg  | 6.6 (3.51)           | (-0.3, 13.5)  | 0.061   |
| IND/GLY 27.5/31.2 bid                                              | 199 | 20.4              | 18.1 (2.76)   | IND 75 µg  | -2.4 (3.51)          | (-9.3, 4.5)   | 0.503   |
| IND 75 µg                                                          | 197 | 20.5              | 20.5 (2.79)   |            |                      |               |         |

All LS means, SEs, CIs, and p-values are from a LMM: Change from baseline (CFB) in mean number of puffs or percentage of days = treatment + baseline value + smoking status at baseline + baseline ICS use + airflow limitation severity + region + random effect of center nested within region.

Baseline raw means are not from the model.



**eTable 6. CAT Total Score, Change From Baseline, at Post-Baseline Visits (EAS)**

| Visit              | Treatment             | Baseline Raw Mean | LS Mean (SE) | Comparator | Treatment Difference |             |         |
|--------------------|-----------------------|-------------------|--------------|------------|----------------------|-------------|---------|
|                    |                       |                   |              |            | LS Mean SE           | 95% CI      | p-value |
| <b>Baseline</b>    | All                   |                   |              |            |                      |             |         |
| <b>Day 85 CFB</b>  | IND/GLY 27.5/15.6 bid | 16.7              | -2.8 (0.39)  | IND 75 µg  | -0.7 (0.54)          | (-1.8, 0.3) | 0.164   |
|                    | IND/GLY 27.5/31.2 bid | 17.7              | -2.7 (0.38)  | IND 75 µg  | -0.7 (0.53)          | (-1.7, 0.4) | 0.199   |
|                    | IND 75 µg             | 17.1              | -2.0 (0.38)  |            |                      |             |         |
| <b>Day 197 CFB</b> | IND/GLY 27.5/15.6 bid | 16.7              | -2.5 (0.41)  | IND 75 µg  | -0.2 (0.57)          | (-1.3,0.9)  | 0.691   |
|                    | IND/GLY 27.5/31.2 bid | 17.4              | -1.8 (0.40)  | IND 75 µg  | -0.5 (0.56)          | (-0.6,1.6)  | 0.401   |
|                    | IND 75 µg             | 16.9              | -2.2 (0.41)  |            |                      |             |         |
| <b>Day 309 CFB</b> | IND/GLY 27.5/15.6 bid | 16.7              | -2.0 (0.43)  | IND 75 µg  | -0.6 (0.6)           | (-1.8,0.6)  | 0.307   |
|                    | IND/GLY 27.5/31.2 bid | 17.4              | -1.4 (0.42)  | IND 75 µg  | 0.0 (0.59)           | (-1.2,1.1)  | 0.973   |
|                    | IND 75 µg             | 17.0              | -1.3 (0.43)  |            |                      |             |         |
| <b>Day 365 CFB</b> | IND/GLY 27.5/15.6 bid | 16.6              | -2.3 (0.42)  | IND 75 µg  | -0.9 (0.58)          | (-2.0,0.3)  | 0.127   |
|                    | IND/GLY 27.5/31.2 bid | 17.4              | -1.1 (0.41)  | IND 75 µg  | 0.4 (0.58)           | (-0.7,1.5)  | 0.5     |
|                    | IND 75 µg             | 17.0              | -1.4 (0.42)  |            |                      |             |         |

All LS Means, SEs, CIs, and p-values are from a MMRM: Change from baseline (CFB) in CAT score = treatment + baseline CAT score + smoking status at baseline + baseline ICS use + airflow limitation severity + region + visit + treatment\* visit interaction + baseline CAT score \*visit interaction

Baseline raw means are not from the model

CAT total score

(Number of patients included in the analysis – IND/GLY 27.5/15.6 bid: n=186, IND/GLY 27.5/31.2 bid: n=193, IND 75 od: n=192)
